# Supplementary material for: Understanding the emotions of patients with inadequate response to antidepressant treatments: results of an international online survey in patients with major depressive disorder
Source: Springer Nature journal article supplement (doi:10.1186/s12888-018-1625-y), 2018-02-05

**Appendix:**

**Table e1. Antidepressants taken by respondents**

| % of patients on... |                    | Total   | US    | Canada | UK    | Germany | France | Spain |
|---------------------|--------------------|---------|-------|--------|-------|---------|--------|-------|
| Minimal dose (mg)   |                    | N=2,096 | n=597 | n=301  | n=300 | n=299   | n=299  | n=300 |
| <b>SSRI</b>         |                    | 76.7%   | 69.8% | 78.1%  | 70.3% | 72.2%   | 87.3%  | 89.0% |
|                     | citalopram 20      |         |       |        |       |         |        |       |
|                     | escitalopram 10    |         |       |        |       |         |        |       |
|                     | fluoxetine 20      |         |       |        |       |         |        |       |
|                     | fluvoxamine 100    |         |       |        |       |         |        |       |
|                     | paroxetine 20      |         |       |        |       |         |        |       |
|                     | paroxetine CR 37.5 |         |       |        |       |         |        |       |
|                     | sertraline 100     |         |       |        |       |         |        |       |
| <b>SNRI</b>         |                    | 33.8%   | 22.4% | 41.5%  | 21.0% | 39.1%   | 40.1%  | 49.7% |
|                     | desvenlafaxine 50  |         |       |        |       |         |        |       |
|                     | duloxetine 60      |         |       |        |       |         |        |       |
|                     | levomilnacipran 40 |         |       |        |       |         |        |       |
|                     | milnacipran 100    |         |       |        |       |         |        |       |
|                     | venlafaxine 75     |         |       |        |       |         |        |       |
| <b>MAOI</b>         |                    | 6.8%    | 0.2%  | 9.3%   | 2.7%  | 14.4%   | 14.0%  | 0.0%  |
|                     | phenelzine 60      |         |       |        |       |         |        |       |
|                     | tranylcypromine 30 |         |       |        |       |         |        |       |
| <b>TCA</b>          |                    | 18.8%   | 5.2%  | 17.3%  | 21.7% | 26.8%   | 25.8%  | 29.3% |
|                     | amitriptyline 75   |         |       |        |       |         |        |       |
|                     | clomipramine 100   |         |       |        |       |         |        |       |
|                     | desipramine 100    |         |       |        |       |         |        |       |
|                     | imipramine 75      |         |       |        |       |         |        |       |
|                     | nortriptyline 75   |         |       |        |       |         |        |       |
| <b>OTHER ADTs</b>   |                    | 24.2%   | 23.8% | 25.6%  | 20.3% | 31.1%   | 18.1%  | 27.0% |
|                     | agomelatine 25     |         |       |        |       |         |        |       |
|                     | bupropion 200      |         |       |        |       |         |        |       |
|                     | mirtazapine 30     |         |       |        |       |         |        |       |
|                     | trazodone 150      |         |       |        |       |         |        |       |
|                     | vilazodone 20      |         |       |        |       |         |        |       |
|                     | vortioxetine 20    |         |       |        |       |         |        |       |

**Figure e1. Symptom frequency (a) individual PHQ-9 items (b) symptoms not assessed by PHQ-9 (n=2,096)**

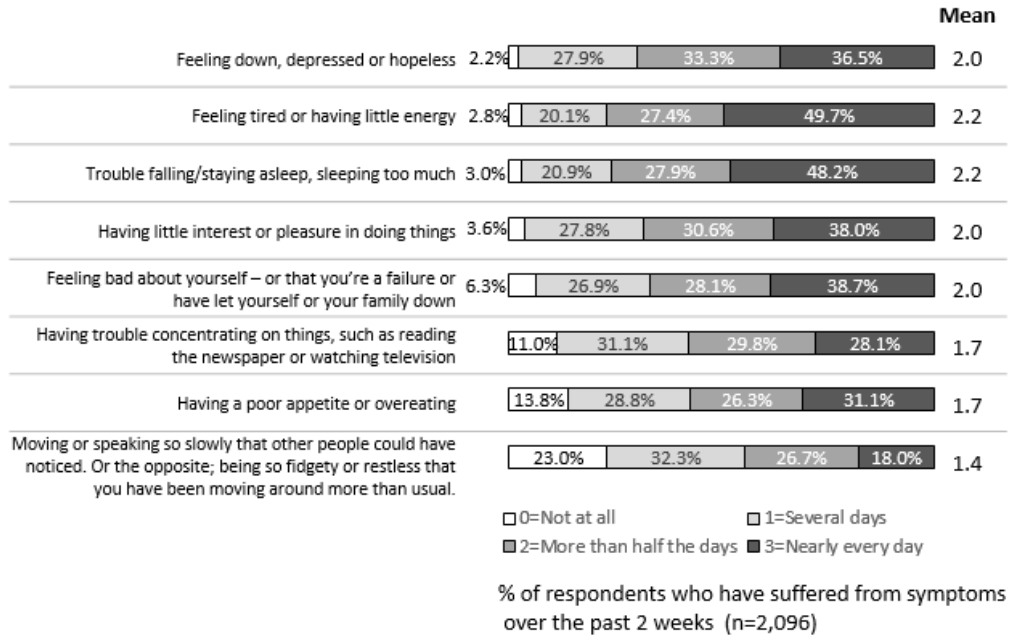

Supplement: MOESM1 [file 15442882]
